# Supplementary material for: Ruthenium pentamethylcyclopentadienyl mesitylene dimer: a sublimable n-dopant and electron buffer layer for efficient n–i–p perovskite solar cells
Source: Royal Society of Chemistry journal article supplement (doi:10.1039/c9ta09838k), 2019-01-01
Supplement: c9ta09838k1.pdf [file c9ta09838k1.pdf]

## Supporting Information

Ruthenium pentamethylcyclopentadienyl mesitylene dimer: a sublimable  
n-dopant and electron buffer layer for efficient n-i-p perovskite solar cells

Jorge Avila<sup>1</sup>, Maria-Grazia La-Placa<sup>1</sup>, Michele Sessolo<sup>1</sup>, Elena Longhi<sup>2</sup>, Stephen Barlow<sup>2</sup>,  
Seth R. Marder<sup>2</sup>, and Henk J. Bolink\*<sup>1</sup>

<sup>1</sup>*Instituto de Ciencia Molecular, Universidad de Valencia, C/ J. Beltrán 2, 46980,  
Paterna, Spain. E/mail: [michele.sessolo@uv.es](mailto:michele.sessolo@uv.es)*

<sup>2</sup>*School of Chemistry and Biochemistry and Center for Organic Photonics and  
Electronics, Georgia Institute of Technology, Atlanta, GA 30332, United States*

### Supporting Information

Materials. Photolithographically patterned ITO coated glass substrates were purchased from Naranjo Substrates ([www.naranjosubstrates.com](http://www.naranjosubstrates.com)). 2,2'-(Perfluoronaphthalene-2,6-diylidene) dimalononitrile (F<sub>6</sub>-TCNNQ) and N<sub>4</sub>,N<sub>4</sub>,N<sub>4</sub>'',N<sub>4</sub>''-tetra([1,1'-biphenyl]-4-yl)-[1,1':4',1''-terphenyl]-4,4''-diamine (TaTm) were provided from Novaled GmbH. Fullerene (C<sub>60</sub>) was purchased from sigma Aldrich. PbI<sub>2</sub> was purchased from Tokyo Chemical Industry CO (TCI), and CH<sub>3</sub>NH<sub>3</sub>I (MAI) from Lumtec. RuCp\*(mes)<sub>2</sub> was synthesized as recently reported.<sup>1-3</sup>

Device preparation. ITO-coated glass substrates were subsequently cleaned with soap, water and isopropanol in an ultrasonic bath, followed by UV-ozone treatment. They were transferred to a vacuum chamber integrated into a nitrogen-filled glovebox (MBraun, H<sub>2</sub>O and O<sub>2</sub> < 0.1 ppm) and evacuated to a pressure of 10<sup>-6</sup> mbar. The vacuum chamber uses a turbomolecular pump (Pfeiffer TMH 261P, DN 100 ISO-K, 3P) coupled to a scroll pump. The vacuum chamber is equipped with six temperature controlled evaporation sources (Creaphys) fitted with ceramic crucibles. The sources were directed upwards with

an angle of approximately  $90^\circ$  with respect to the bottom of the evaporator. The substrate holder to evaporation sources distance is approximately 20 cm. Three quartz crystal microbalance (QCM) sensors are used, two monitoring the deposition rate of each evaporation source and a third one close to the substrate holder monitoring the total deposition rate. For thickness calibration, we first individually sublimed the charge transport materials and their dopants (TaTm and F<sub>6</sub>-TCNNQ, C<sub>60</sub> and (RuCp\*mes)<sub>2</sub>). A calibration factor was obtained by comparing the thickness inferred from the QCM sensors with that measured with a mechanical profilometer (Ambios XP1). Then these materials were co-sublimed at temperatures ranging from 135-160 °C for the dopants to 250 °C for the pure charge transport molecules, and the evaporation rate was controlled by separate QCM sensors and adjusted to obtain the desired doping concentration. In general, the deposition rate for TaTm and C<sub>60</sub> was kept constant at  $0.8 \text{ \AA s}^{-1}$  while varying the deposition rate of the dopants during co-deposition. Pure TaTm, C<sub>60</sub>, and (RuCp\*mes)<sub>2</sub> layers were deposited at a rate of  $0.5 \text{ \AA s}^{-1}$ .

The samples for conductivity measurements were deposited on interdigitated ITO and for absorbance measurements on glass substrate. The materials and thicknesses for each sample are: One sample with 10 nm of C<sub>60</sub>, one sample with 2.5 nm of (RuCp\*mes)<sub>2</sub>, one sample with the bilayer (RuCp\*mes)<sub>2</sub>/C<sub>60</sub> (2.5 nm/10 nm), and one sample with co-sublimed C<sub>60</sub>:(RuCp\*mes)<sub>2</sub> (10 nm 12.5wt%).

For devices with different concentration of dopant (12.5wt%, 6.26wt% and 2.5wt%), 20 nm of the n-doped electron-transport layer (C<sub>60</sub>:(RuCp\*mes)<sub>2</sub>) capped with 10 nm of the pure C<sub>60</sub> were deposited. For devices with a thin layer of dopant between ITO and C<sub>60</sub>, a thin (1 nm or 2.5 nm) layer of the molecule (RuCp\*mes)<sub>2</sub> is deposited on top of the ITO prior to depositing the layer of C<sub>60</sub> (10 nm). For the device with C<sub>60</sub> directly on top of ITO, only 10 nm of pure C<sub>60</sub> was evaporated. Once completed this deposition, the chamber was vented with dry N<sub>2</sub> to replace the ETL crucibles with those containing the starting materials for the perovskite deposition, PbI<sub>2</sub>, and CH<sub>3</sub>NH<sub>3</sub>I. The vacuum chamber was evacuated again to a pressure of  $10^{-6}$  mbar, and the perovskite films were then obtained by co-deposition of the two precursors. The use of clean QCM sensors for the perovskite evaporation is important to avoid false readings due to perovskite formation on the sensor. For a more accurate deposition the density of PbI<sub>2</sub> ( $6.16 \text{ g/cm}^3$ ) is set in the equipment. For CH<sub>3</sub>NH<sub>3</sub>I the density is assumed to be  $1 \text{ g/cm}^3$ . And the z-factor for both materials is set to 1. The calibration of the deposition rate for the CH<sub>3</sub>NH<sub>3</sub>I was found to

be difficult due to non-uniform layers and the soft nature of the material, which impeded accurate thickness measurements. Hence, the source temperature of the  $\text{CH}_3\text{NH}_3\text{I}$  was kept constant at  $70\text{ }^\circ\text{C}$  and the  $\text{CH}_3\text{NH}_3\text{I}:\text{PbI}_2$  ratio was controlled off line using grazing incident x-ray diffraction by adjusting the  $\text{PbI}_2$  deposition temperature. The optimum deposition temperatures were found to be  $250\text{ }^\circ\text{C}$  for the  $\text{PbI}_2$  and  $70\text{ }^\circ\text{C}$  for the  $\text{CH}_3\text{NH}_3\text{I}$ . After deposition of a  $500\text{ nm}$  thick perovskite film, the chamber was vented, and the crucibles replaced with those containing the hole-transport materials and evacuated again to a pressure of  $10^{-6}$  mbar. The devices were completed depositing a film of pure TaTm ( $10\text{ nm}$  for devices) and  $40\text{ nm}$  of the p-doped electron-transport layer (TaTm:  $\text{F}_6\text{-TCNNQ}$ ). Afterwards the metal top contact (Au,  $100\text{ nm}$  thick) was deposited.

Characterization. X-ray diffraction (XRD) pattern were collected at room temperature on an Empyrean PANalytical powder diffractometer in Bragg-Brentano configuration using the Cu  $\text{K}\alpha_1$  radiation. Typically, three consecutive measurements were collected and averaged into single spectra. Scanning Electron Microscopy (SEM) images were performed on a Hitachi S-4800 microscope operating at an accelerating voltage of  $2\text{ kV}$  over Platinum - metallized samples. Absorption spectra were collected using a fiber optics based Avantes Avaspec2048 Spectrometer. Characterization of the solar cells was performed as follows. The external quantum efficiency (EQE) was estimated using the cell response at different wavelength (measured with a white light halogen lamp in combination with band-pass filters), where the solar spectrum mismatch is corrected using a calibrated Silicon reference cell (MiniSun simulator by ECN, the Netherlands). The current density-voltage (J-V) characteristics were obtained using a Keithley 2400 source measure unit and under white light illumination, and the short circuit current density was corrected considering the device EQE. The electrical characterization was validated using a solar simulator by Abet Technologies (model 10500 with an AM1.5G xenon lamp as the light source). Before each measurement, the exact light intensity was determined using a calibrated Si reference diode equipped with an infrared cut-off filter (KG-3, Schott). The J-V curves were recorded between  $-0.2$  and  $1.2\text{ V}$  with  $0.01\text{ V}$  steps, integrating the signal for  $20\text{ ms}$  after a  $10\text{ ms}$  delay. This corresponds to a speed of about  $0.3\text{ V s}^{-1}$ . The layout used to test the solar cells has four equal areas ( $6.53\text{ mm}^2$ , defined as the overlap between the ITO and the top metal contact) and measured through a shadow mask with  $2.64\text{ mm}^2$  aperture.

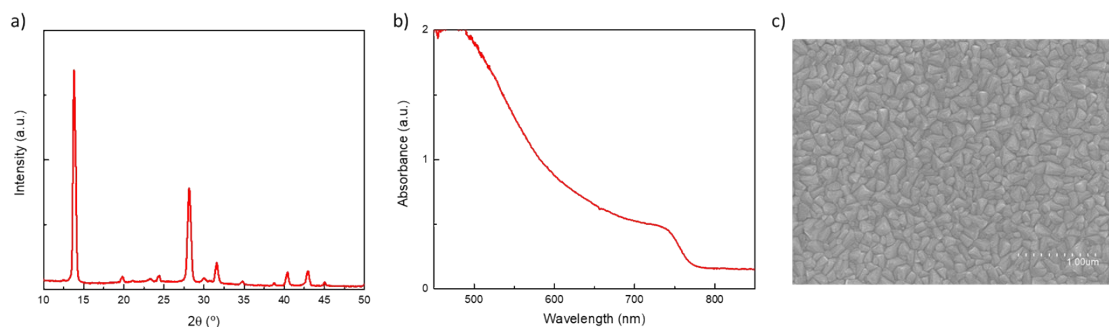

**Fig S1** (a) XRD pattern, (b) optical absorbance and (c) surface SEM picture of the vacuum-deposited  $\text{CH}_3\text{NH}_3\text{PbI}_3$  thin films for devices preparation.

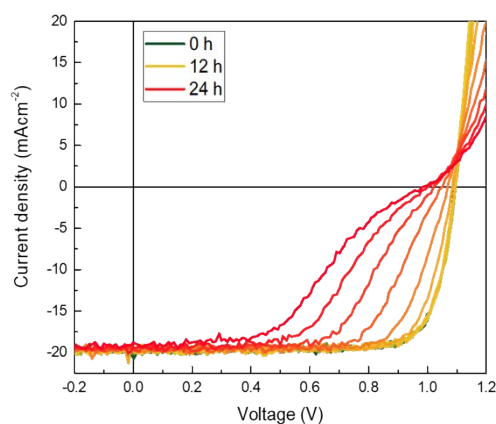

**Figure S2.** J-V curves under illumination for a perovskite solar cell employing a  $\text{C60}:(\text{RuCp}^*\text{mes})_2$  film (20 nm) as the ETL. The device was kept under continuous simulated solar illumination without encapsulation.

## References

- 1 O. V Gusev, M. A. Ievlev, M. G. Peterleitner, S. M. Peregudova, L. I. Denisovich, P. V Petrovskii and N. A. Ustynyuk, *J. Organomet. Chem.*, 1997, **534**, 57–66.
- 2 S. Guo, S. B. Kim, S. K. Mohapatra, Y. Qi, T. Sajoto, A. Kahn, S. R. Marder and S. Barlow, *Adv. Mater.*, 2012, **24**, 699–703.
- 3 H.-I. Un, S. A. Gregory, S. K. Mohapatra, M. Xiong, E. Longhi, Y. Lu, S. Rigin, S. Jhulki, C.-Y. Yang, T. V Timofeeva, J.-Y. Wang, S. K. Yee, S. Barlow, S. R. Marder and J. Pei, *Adv. Energy Mater.*, 2019, **9**, 1900817.
